# Supplementary material for: Accuracy of right atrial pressure estimation using a multi-parameter approach derived from inferior vena cava semi-automated edge-tracking echocardiography: a pilot study in patients with cardiovascular disorders
Source: Springer Nature journal article supplement (doi:10.1007/s10554-020-01814-8), 2020-03-19
Supplement: MOESM1 [file 17815454]

| **3 Classes Methods** | **ME** |
| --- | --- |
| Method A | 51% |
| Method A mean diameter | 45% |
| BTM 3 Classes | 14% |
| **5 Classes Methods** |  |
| Method B | 69% |
| Method B mean diameter | 71% |
| BTM 5 Classes | 22% |
