# Supplementary material for: Accuracy of right atrial pressure estimation using a multi-parameter approach derived from inferior vena cava semi-automated edge-tracking echocardiography: a pilot study in patients with cardiovascular disorders
Source: Springer Nature journal article supplement (doi:10.1007/s10554-020-01814-8), 2020-03-19
Supplement: MOESM2 [file 17815454]

|  | **ME**  **Group with AF (N=14)** | **ME**  **Group with No AF (N=35)** | **P-value** |
| --- | --- | --- | --- |
| **3 Classes** |  |  |  |
| Method A | 50% | 51% | 1 |
| Method A mean diameter | 29% | 51% | 0.21* |
| BTM 3 Classes | 14% | 14% | 1 |
| **5 Classes** |  |  |  |
| Method B | 50% | 69% | 0.33 |
| Method B mean diameter | 64% | 74% | 0.50 |
| BTM 5 Classes | 21% | 26% | 1 |

*underpowered analysis to show any statistical difference
