# Supplementary material for: Accuracy of right atrial pressure estimation using a multi-parameter approach derived from inferior vena cava semi-automated edge-tracking echocardiography: a pilot study in patients with cardiovascular disorders
Source: Springer Nature journal article supplement (doi:10.1007/s10554-020-01814-8), 2020-03-19
Supplement: MOESM5 [file 17815454]

| variable | Low RAP  (n 12) | Intermediate RAP (n 14) | High RAP  (n 23) | p-value |
| --- | --- | --- | --- | --- |
| Age (years) | 56±16 | 64±15 | 64±15 | 0.404 |
| Male (%) | 50% | 50% | 57% | 0.901 |
| Smokers (%) | 25% | 7% | 9% | 0.297 |
| Hypertension (%) | 67% | 57% | 65% | 0.851 |
| Dyslipidemia (%) | 30% | 40% | 30% | 0.473 |
| Diabetes (%) | 33% | 43% | 17% | 0.230 |
| Combined Heart Disease (hypertensive, ischemic, valvular, tachy-induced, toxic) | 8.3% | 35.7% | 47.8% | 0.020 |
| NYHA FC 1 | 0% | 14% | 0% | 0.283 |
| NYHA FC 2 | 33% | 29% | 30% |
| NYHA FC 3 | 66% | 43% | 61% |
| NYHA FC 4 | 0% | 4% | 4% |
| Ejection Fraction (%) | 44±21 | 53±17 | 47±20 | 0.128 |
| Mean Pulmonary Artery Pressure (mmHg) | 24±9 | 32±9 | 40±11 | 0.0001 |
| Wedge Pressure (mmHg) | 14±8 | 16±5 | 21±7 | 0.017 |
